# Supplementary material for: A trimodal detection paper chip for undisclosed drug “sibutramine” in nutraceuticals
Source: Royal Society of Chemistry journal article supplement (doi:10.1039/d3ay00852e), 2023-01-01
Supplement: d3ay00852e1.pdf [file d3ay00852e1.pdf]

## A trimodal detection paper chip for undisclosed drug “Sibutramine” in nutraceuticals

Heba T. Elbalkiny<sup>a</sup>, Ali M. Yehia<sup>b,c</sup>, Mahmoud A. Tantawy<sup>\*b,d</sup>

<sup>a</sup> October University for Modern Sciences and Arts, Faculty of Pharmacy, Analytical Chemistry Department, 11787 6th October City, Egypt

<sup>b</sup> Cairo University, Faculty of Pharmacy, Analytical Chemistry Department, El-Kasr-El Aini St, 11562 Cairo, Egypt <sup>c</sup> School of Life and Medical Sciences, University of Hertfordshire Hosted by Global Academic Foundation, New Capital, Garden City, Cairo R5 New, Egypt

<sup>d</sup> Chemistry Department, Faculty of Pharmacy, October 6 University, 6 October City, Giza, Egypt

\*Corresponding author, e-mail: [mahmoud.eltantawy@pharma.cu.edu.eg](mailto:mahmoud.eltantawy@pharma.cu.edu.eg); [matantawy@hotmail.com](mailto:matantawy@hotmail.com)

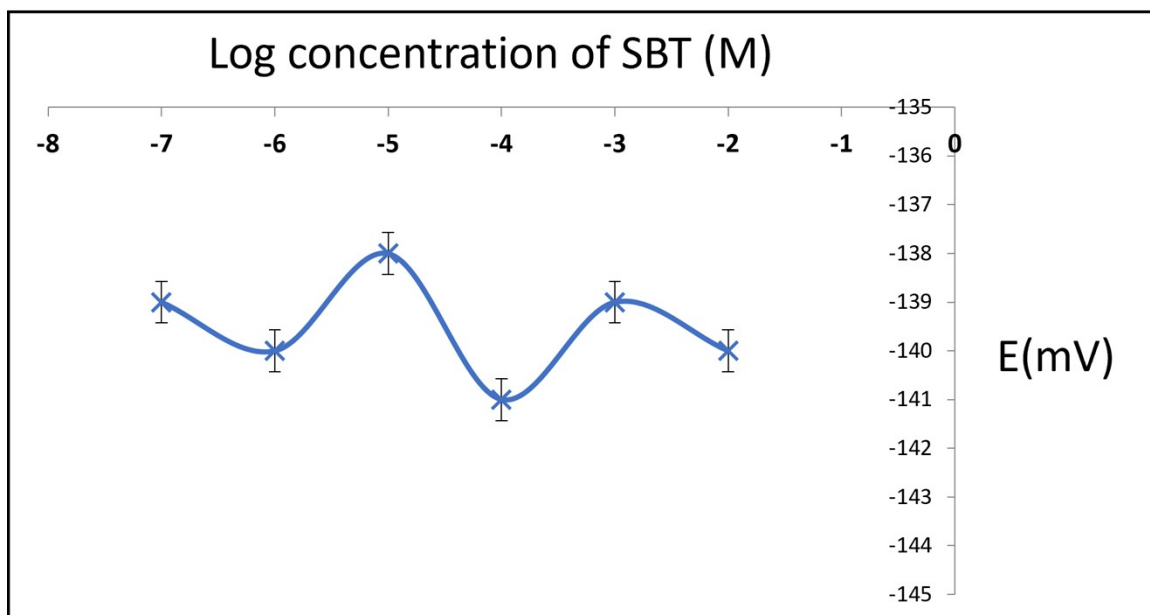

**Fig. S1.** Potential readings of the proposed screen-printed reference electrode in conjunction with Ag/AgCl reference one in  $1.0 \times 10^{-7}$ – $1.0 \times 10^{-2}$  M SBT solutions.

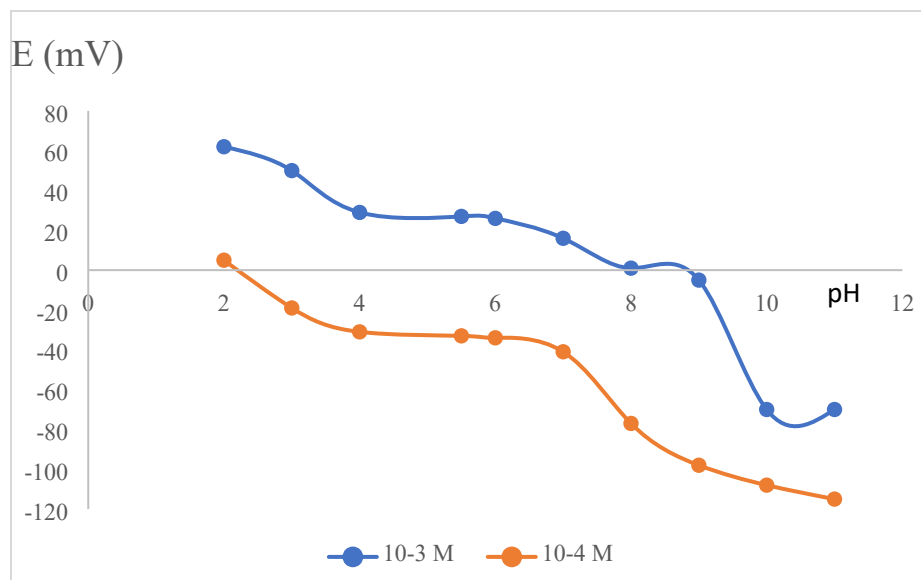

**Fig. S2.** Effect of pH on the response of the proposed electrodes at concentrations  $10^{-3}$  and  $10^{-4}$  M.

**Table S1.** Statistical comparison of the results obtained by the proposed potentiometric and fluorimetric sensors and the reported method on pure form.

| <b>Term</b>                                        | <b>HPLC-Reported method <sup>a</sup></b> | <b>Potentiometric sensor</b> | <b>Fluorimetric sensor</b> |
|----------------------------------------------------|------------------------------------------|------------------------------|----------------------------|
| <b>Mean</b>                                        | 100.04                                   | 100.65                       | 101.13                     |
| <b>± SD</b>                                        | 1.85                                     | 2.94                         | 3.28                       |
| <b>Variance</b>                                    | 3.42                                     | 8.64                         | 10.75                      |
| <b>n</b>                                           | 5                                        | 5                            | 5                          |
| <b>Student's <i>t</i>-test (2.364)<sup>b</sup></b> | NA                                       | 0.393                        | 0.647                      |
| <b><i>F</i> value (6.591)<sup>b</sup></b>          | NA                                       | 1.012                        | 1.022                      |

<sup>a</sup> HPLC analysis using a phenyl column (5.0  $\mu\text{m}$ , 150 mm  $\times$  4.6 mm, i.d.) and an isocratic mobile phase of acetonitrile–water–formic acid (pH 3.0; 0.19 M) (45:55:0.78, v/v/v).

<sup>b</sup> Figures between parentheses represent the corresponding tabulated values of *t* and *F* at  $P=0.05$ .

**Table S2.** Greenness assessment of the proposed sensor using Eco-Scale and GAPI tools

| <b>Greenness profile</b>                                                                                                                                                                                                                                                                                                                                                                                       | <b>EC-<math>\mu</math>PAD sensor</b> |
|----------------------------------------------------------------------------------------------------------------------------------------------------------------------------------------------------------------------------------------------------------------------------------------------------------------------------------------------------------------------------------------------------------------|--------------------------------------|
| <b>Analytical ecoscale</b>                                                                                                                                                                                                                                                                                                                                                                                     |                                      |
| Reagents                                                                                                                                                                                                                                                                                                                                                                                                       |                                      |
| THF                                                                                                                                                                                                                                                                                                                                                                                                            | 6                                    |
| Buffer                                                                                                                                                                                                                                                                                                                                                                                                         | 0                                    |
| HAuCl <sub>4</sub>                                                                                                                                                                                                                                                                                                                                                                                             | 4                                    |
| Trisodium citrate                                                                                                                                                                                                                                                                                                                                                                                              | 1                                    |
| Citric acid                                                                                                                                                                                                                                                                                                                                                                                                    | 1                                    |
| Urea                                                                                                                                                                                                                                                                                                                                                                                                           | 1                                    |
|                                                                                                                                                                                                                                                                                                                                                                                                                | 0                                    |
| Energy ( $\leq 0.1$ kWh per sample)                                                                                                                                                                                                                                                                                                                                                                            | 0                                    |
| Occupational Hazard                                                                                                                                                                                                                                                                                                                                                                                            | 6                                    |
| Waste                                                                                                                                                                                                                                                                                                                                                                                                          | 19                                   |
| Total Penalty points                                                                                                                                                                                                                                                                                                                                                                                           | 81                                   |
| Analytical Eco-Scale total score                                                                                                                                                                                                                                                                                                                                                                               |                                      |
| <b>GAPI</b>                                                                                                                                                                                                                                                                                                                                                                                                    |                                      |
| <p>The GAPI diagram consists of five pentagons arranged in a row. The first, second, and third pentagons are green and labeled 'Sample Handling', 'Quantification', and 'Instrumentation' respectively. The fourth pentagon is yellow and labeled 'Reagents used'. The fifth pentagon is green and labeled 'General method type'. A line connects the 'Quantification' label to the second green pentagon.</p> |                                      |

**Table S3.** Determination of SBT in slimming formulations using the proposed device and the recovery of the spiked standard concentrations.

| Slimming formulations  | Potentiometric sensor                                    |                                                     | Fluorimetric sensor                                      |                                                     | Colorimetric sensor           |
|------------------------|----------------------------------------------------------|-----------------------------------------------------|----------------------------------------------------------|-----------------------------------------------------|-------------------------------|
|                        | Found concentration in spiked sample (w/w%) <sup>a</sup> | Calculated concentration in un-spiked sample (w/w%) | Found concentration in spiked sample (w/w%) <sup>a</sup> | Calculated concentration in un-spiked sample (w/w%) | Color change in spiked sample |
| via ananas capsules    | 0.86                                                     | 0.02 <sup>b</sup>                                   | 0.85                                                     | 0.01 <sup>b</sup>                                   | Not detected                  |
| Aplex                  | 0.29                                                     | 0.26                                                | 0.31 <sup>c</sup>                                        | 0.28                                                | Detected                      |
| Sekem herbal tea       | 0.43                                                     | 0.01 <sup>b</sup>                                   | 0.43 <sup>c</sup>                                        | 0.01 <sup>b</sup>                                   | Not detected                  |
| Chinese herbal mixture | 0.71                                                     | 0.44                                                | 0.72                                                     | 0.45                                                | Detected                      |

<sup>a</sup> Average of five determination.

<sup>b</sup> Calculated values are within the random error of the proposed methods (2.94% for potentiometric and 3.28% for fluorimetric sensors)

<sup>c</sup> Five-fold dilution was applied before measurement.
